# Supplementary material for: Gene Set-Based Module Discovery Decodes cis-Regulatory Codes Governing Diverse Gene Expression across Human Multiple Tissues
Source: PLoS One. 2010 Jun 9;5(6):e10910. doi: 10.1371/journal.pone.0010910 (PMC2882937; doi:10.1371/journal.pone.0010910)
Supplement: Table S1 — p-values by BEEM, EEM and SSA (GS:TF binding motif, Exp:multiple tissues). (0.02 MB XLS) [file pone.0010910.s001.xls]

## Sheet: Sheet1
Table S1. p-values by BEEM, EEM and SSA.
GS:TF binding motif, Exp:multiple tissues
	BEEM	EEM	SSA
V$AFP1_Q6	0.207995	0.351226	0.0949609
V$AHRARNT_02	0.444929	1.59459	0.000393465
V$AHR_01	0.644187	0.908191	1.8761e-13
V$AHR_Q5	4.90137	2.95523	6.67636e-05
V$ALPHACP1_01	7.10873	2.59948	0.785219
V$AML_Q6	0.0461168	0.382182	1.62287
V$AP1_C	0.439533	0.0125751	7.29821
V$AP1_Q4	7.49823e-09	0.0120697	2.58265
V$AP1_Q6_01	0.127319	0.180457	5.87568
V$AP2ALPHA_02	0.579136	0.551209	0.00474014
V$AP2ALPHA_03	0.0645816	0.0086984	0.590873
V$AP2GAMMA_01	0.250509	0.0596563	0.00589873
V$AP4_01	0.0910897	0.0732934	0.257078
V$AP4_Q6	0.00332697	0.130299	6.14663
V$AREB6_01	0.0169882	0.000953395	6.22621
V$AREB6_04	0.00260032	0.297424	1.08883
V$ARP1_01	0.522545	1.94482	3.41457e-07
V$AR_02	0.720444	0.0102081	0.688501
V$AR_04	2.40312e-06	0.288122	0.0149615
V$BCL6_02	1.60906	0.0125011	1.1116
V$BCL6_Q3	0.000486337	0.292755	0.134828
V$BLIMP1_Q6	0.181945	0.755259	0.190618
V$BRN2_01	0.796381	0.248855	1.7976931348623157E308
V$CACCCBINDINGFACTOR_Q6	0.0692092	0.223779	0.399795
V$CBF_02	3.29595	0.207125	1.99909
V$CDPCR3HD_01	0.00623862	0.34479	5.19888
V$CDPCR3_01	6.32931e-05	0.0447711	0.659993
V$CDP_01	0.00576017	0.019561	2.05206
V$CDX_Q5	0.244315	0.00611751	11.7061
V$CEBPB_01	0.405263	0.00178106	1.7976931348623157E308
V$CEBPGAMMA_Q6	0.00159826	0.209586	1.7976931348623157E308
V$CEBP_C	0.000432082	0.330802	5.72635
V$CETS1P54_02	2.67414	0.974397	2.02378
V$CETS1P54_03	6.84298	5.96159	0.159878
V$CIZ_01	1.18776	1.53722	1.69542
V$CLOX_01	0.117398	0.0384611	3.64839
V$CMYC_01	2.86143	3.48495	0.0442445
V$COMP1_01	0.165256	0.818134	0.717225
V$COUP_01	0.00120822	0.402455	0.723193
V$CP2_01	0.616637	0.37113	0.0874476
V$CREBP1_Q2	2.57068	2.5387	0.013182
V$CREB_Q2_01	3.11223	1.33384	0.000815558
V$CREB_Q4	1.29439	1.71046	0.00171838
V$CTCF_01	0.541731	1.00665	0.0418435
V$CTF1_01	0.456885	0.398699	0.477879
V$DEAF1_01	2.95176	5.57272	1.37164e-05
V$DEAF1_02	2.48102	1.57162	1.53255e-05
V$DMRT2_01	7.46981e-07	0.00131928	2.79444
V$DMRT5_01	0.0828848	0.0652658	13.3461
V$DR1_Q3	0.205578	1.29343	0.466743
V$DR3_Q4	0.640309	0.313989	0.037472
V$E2F1DP2_01	19.732	5.0378	1.7976931348623157E308
V$E2F1_Q6	25.3812	8.50573	1.7976931348623157E308
V$E2F4DP1_01	28.5762	8.89656	1.7976931348623157E308
V$E2F_Q4_01	21.4498	4.84203	1.7976931348623157E308
V$E2_01	0.0633741	0.471471	0.0996479
V$E47_02	0.25463	0.0159361	4.45618
V$E4BP4_01	0.349489	0.637888	0.203592
V$EFC_Q6	0.102747	0.0661163	0.565189
V$EGR1_01	0.431271	0.740822	4.19161e-05
V$EGR_Q6	1.50861	0.0808228	0.00088785
V$ELK1_04	8.12517	11.5907	3.89696e-09
V$EVI1_02	0.0326349	0.120971	0.197251
V$EVI1_05	0.322189	0.00503334	1.7976931348623157E308
V$FOXJ2_01	0.336637	0.00245883	15.6536
V$FOXJ2_02	1.31334e-06	0.0478065	4.46435
V$FOXO1_01	0.297929	0.0259083	5.56695
V$FOXO4_02	0.0142962	0.108499	1.26509
V$FOXP3_Q4	0.0993244	0.515339	2.40121
V$FREAC4_01	5.61845e-06	0.00464858	2.50199
V$FXR_Q3	0.123691	0.713267	9.93534e-08
V$GAF_Q6	0.000371045	0.14614	0.626992
V$GATA1_04	0.255454	0.0210676	13.384
V$GATA1_06	0.322189	0.175093	6.39127
V$GATA4_Q3	2.80218e-06	0.0282728	9.08036
V$GCM_Q2	0.0474753	0.0158896	1.26029
V$GCNF_01	0.00178061	0.615521	0.134449
V$GFI1_01	0.738597	0.37535	1.7976931348623157E308
V$GLI_Q2	0.0562278	0.00812079	0.834868
V$GR_Q6_01	0.386057	0.32883	0.78967
V$HAND1E47_01	0.0124169	0.0132224	1.7976931348623157E308
V$HEN1_01	0.000582312	0.0470086	0.583182
V$HES1_Q2	0.981325	1.20461	0.000617253
V$HIF1_Q5	7.10645	6.64586	0.0194684
V$HMX1_01	0.000522315	0.261328	0.102482
V$HNF1_C	0.0217948	0.00306753	8.28008
V$HNF1_Q6	0.137954	0.000807201	1.7976931348623157E308
V$HNF3_Q6_01	2.88831	0.0332676	11.82
V$HNF4_DR1_Q3	0.265209	1.33491	0.237527
V$HOX13_01	0.370445	0.479563	0.392131
V$HP1SITEFACTOR_Q6	0.039628	0.374438	3.33568
V$HSF1_Q6	1.79619	2.2361	9.68822e-06
V$HSF2_01	1.90542	1.10931	1.64848
V$HTF_01	2.73836	3.38665	3.6296e-05
V$IK2_01	0.00151152	0.375781	0.0967942
V$IK_Q5	0.00868312	0.228153	0.0124503
V$IRF2_01	1.5677	2.21231	3.82259e-13
V$IRF_Q6_01	6.52735	0.427051	8.26823
V$ISRE_01	2.76341	0.36501	0.133273
V$KAISO_01	0.549804	0.267174	0.250092
V$LEF1TCF1_Q4	2.04834e-08	0.0311853	3.35102
V$LEF1_Q2_01	0.0147565	0.0712954	0.650089
V$LMAF_Q2	0.897771	0.0204516	9.56733
V$LXR_DR4_Q3	0.000885336	0.408	0.000117668
V$MAF_Q6	3.42991	2.02295	1.02604e-05
V$MAZR_01	4.73946e-11	0.0193897	2.88941
V$MEF2_Q6_01	0.0107164	0.10526	1.7976931348623157E308
V$MEIS1BHOXA9_02	0.000609568	0.230693	0.000918068
V$MIF1_01	0.129791	0.881801	2.16974e-15
V$MIZF_01	1.59891	2.29628	1.6248e-05
V$MTF1_Q4	0.0234868	0.131116	3.33538
V$MYB_Q3	3.52905e-05	0.266209	2.05027
V$MYCMAX_03	4.17311	2.60674	5.70794e-06
V$MYOD_01	2.54666	0.213125	9.55373
V$MYOD_Q6_01	0.587137	0.295767	2.9492
V$MZF1_01	0.135421	0.260745	0.0740554
V$NANOG_01	0.645073	0.476579	0.639327
V$NERF_Q2	1.77381	0.680336	8.31208e-07
V$NF1_Q6_01	0.018804	0.0699082	0.269771
V$NFAT_Q6	0.0249064	0.0457426	7.35123
V$NFE2_01	0.455261	2.6725	0.000419974
V$NFKAPPAB_01	2.59351	0.986218	0.00546906
V$NFKB_C	2.62882	0.0642931	0.365517
V$NFKB_Q6_01	2.618	0.0901973	2.45159
V$NFMUE1_Q6	17.5955	28.6247	0.776064
V$NFY_01	15.9557	4.05488	12.8898
V$NKX25_01	0.000114061	0.0140874	4.98077
V$NKX25_Q5	1.16518	1.09185	0.00332106
V$NKX3A_01	0.584757	0.07704	1.7976931348623157E308
V$NMYC_01	6.76105	4.22689	0.00402128
V$NRF1_Q6	11.4323	10.2567	2.2501
V$NRF2_01	10.7378	16.5509	0.0276923
V$NUR77_Q5	0.085764	0.948318	0.726399
V$OCT1_01	1.97676	0.017451	3.91347
V$OCT1_Q5_01	0.148382	0.00195434	8.50461
V$OCT4_01	0.0643888	0.0308439	1.7976931348623157E308
V$OLF1_01	0.443973	0.1024	0.0483596
V$P53_DECAMER_Q2	0.00201427	0.202152	0.00674421
V$PAX3_01	2.95936	2.0366	8.01496e-07
V$PAX4_02	0.449922	0.129725	1.7976931348623157E308
V$PAX4_04	1.00919	0.0568652	10.6128
V$PAX5_01	0.0214327	0.434137	0.0659608
V$PAX6_01	0.627576	0.00129428	5.06536
V$PAX6_Q2	0.464266	0.0153467	0.00101075
V$PAX9_B	0.0206914	0.186243	1.10393e-07
V$PITX2_Q2	0.265999	0.0752567	1.32537
V$POU3F2_01	0.144473	0.454243	0.0612242
V$POU3F2_02	0.592361	0.602337	1.78182e-08
V$POU6F1_01	0.0151814	0.000856099	1.7976931348623157E308
V$PR_01	0.0847346	0.443228	1.98898
V$PTF1BETA_Q6	0.813649	0.169068	0.00172766
V$PU1_Q4	14.3957	3.86002	1.7976931348623157E308
V$PXRRXR_02	0.310245	0.00617312	2.10069
V$RBPJK_01	0.279436	0.99349	0.166766
V$RFX1_02	0.0107164	0.197691	7.59003
V$RORA1_01	0.359678	0.0496159	0.902678
V$RORA2_01	0.448439	0.173592	9.36669e-11
V$RREB1_01	0.728582	0.18506	0.504825
V$RSRFC4_01	0.00612786	0.0638522	1.05075
V$R_01	0.223335	0.176006	0.000706821
V$S8_01	0.288853	0.0575636	14.5232
V$SMAD3_Q6	0	0.00977972	4.94453
V$SOX17_01	1.67894e-10	0.0792932	4.75958
V$SOX_Q6	0.26725	0.420012	0.0314436
V$SP1_Q4_01	7.18133	4.05755	0.00212406
V$SREBP1_02	1.39082	0.453612	0.0309068
V$SREBP1_Q5	0.416321	0.0743735	0.0246603
V$SREBP_Q3	0.646668	0.0478496	1.03888
V$SRF_C	0.00548882	0.129922	0.190118
V$SRF_Q4	0.00277069	0.00264854	5.32381
V$STAF_02	7.40932	5.08175	0.0400981
V$STAT3STAT3_Q3	0.569033	1.06487	1.72106e-06
V$STAT5A_02	1.37215e-05	0.331129	1.98896
V$STAT5B_01	0.299622	0.166776	0.00721841
V$STAT6_02	1.60579	0.312714	1.5987
V$SZF11_01	1.31317	0.0576869	0.511669
V$T3R_01	0.00156761	0.324686	9.31251e-05
V$TAL1ALPHAE47_01	0.000391176	0.00221492	3.97954
V$TBP_01	4.99522e-14	0.0276433	1.7976931348623157E308
V$TBX5_01	0.801267	0.00444194	2.76833
V$TBX5_Q5	0.896426	0.0756638	1.08502
V$TEL2_Q6	9.92214	9.99016	0.00162013
V$TFIIA_Q6	0.00691997	0.890038	1.15068e-07
V$TGIF_01	0.600595	0.110884	0.691387
V$TITF1_Q3	0.130847	0.17569	3.94542
V$USF_Q6_01	2.53395	0.955886	2.61354e-09
V$VBP_01	2.03656e-07	0.321524	3.23878
V$VDRRXR_01	0.219429	0.194614	0.00316097
V$VDR_Q3	0.160311	0.0617016	0.933818
V$VJUN_01	0.844656	0.395131	7.01092e-11
V$VMYB_02	4.35794	2.36314	1.54983
V$WHN_B	3.8822	6.74914	0.00110588
V$XFD1_01	0.0529157	0.0172326	4.16592
V$XPF1_Q6	0.00086448	0.0928424	0.0596559
V$YY1_01	1.37215e-05	0.459508	1.32115
V$ZBRK1_01	0.303375	0.108196	0.121659
V$ZEC_01	0.121247	0.332371	0.0173701
V$ZID_01	0.57407	0.905149	0.552662
